# Supplementary material for: Genome-Wide Identification and Expression Analysis Reveal bZIP Transcription Factors Mediated Hormones That Functions during Early Somatic Embryogenesis in Dimocarpus longan
Source: MDPI journal article supplement (doi:10.3390/plants13050662), 2024-02-28
Supplement: s1 [file s1]

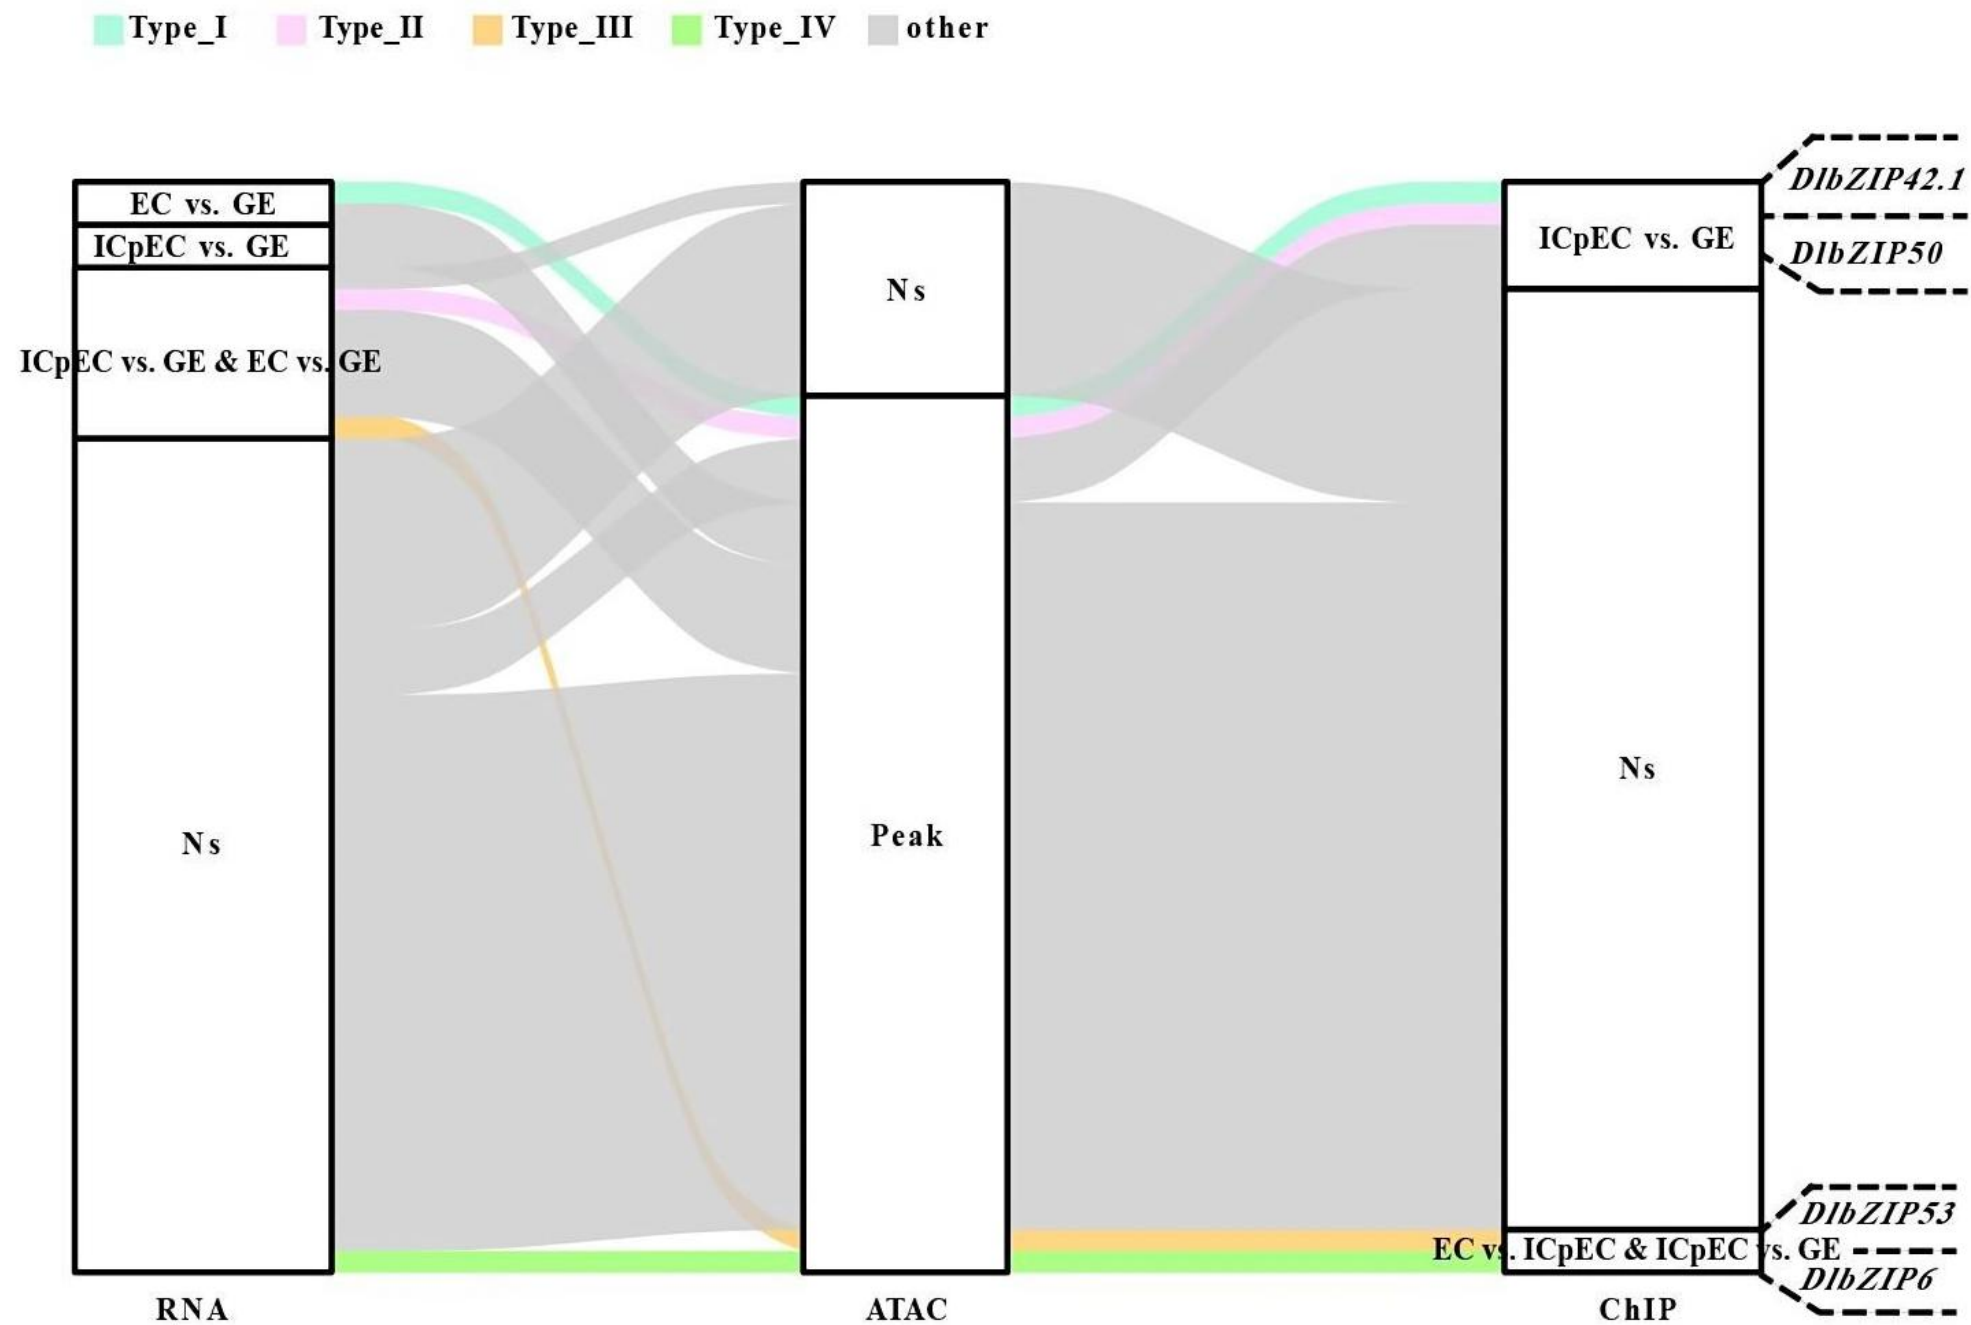

**Fig. S1** Alluvial diagram of *DlbZIP* genes divided into three types (type I to II and other). Type I to II stand for differentially accessible *DlbZIP* genes between RNA-seq, ATAC-seq and H3K4me1 database. Other stand for no difference in three databases. The right is the representative gene of each type.
