# Supplementary material for: Genome-Wide Identification and Expression Analysis Reveal bZIP Transcription Factors Mediated Hormones That Functions during Early Somatic Embryogenesis in Dimocarpus longan
Source: Plants (Basel). 2024 Feb 28;13(5):662. doi: 10.3390/plants13050662 (PMC10934284; doi:10.3390/plants13050662)
Supplement: Supplementary file 1 [file plants-13-00662-s001.zip › Table S1-3.xlsx]

## Sheet: Sheet1
Table S1. Analysis of physicochemical properties of DlbZIP family members
Gene ID(PacBio+	Gene ID	Gene	Corresponding Arabidopsis name	Corresponding Arabidopsis ID	Number of amino acids(aa)	Molecular Weight/ku	Isoelectric Point(PI)	Instability index	GRAVY	Subcellular location	Signal
Illumina+Hi-C)	(Illumina)	name
Dlo000013	Dlo_022116.1	DlbZIP9.1	AtbZIP9	AT5G24800	342	37.82	7.19	55.21	-0.872	Nucleus	No
Dlo000016	Dlo_022123.2	DlbZIP9.2	AtbZIP9	AT5G24800	1545	177.87	6.86	51.16	-0.678	Nucleus	No
Dlo000703	Dlo_015386.1	DlbZIP56	AtbZIP56	AT5G11260	167	18.26	9.34	69.46	-1.112	Nucleus	No
Dlo001894	Dlo_033004.1	DlbZIP69	AtbZIP69	AT1G06070	426	46.13	6.24	59.07	-0.743	Nucleus	No
Dlo003346	Dlo_024982.1	DlbZIP1	AtbZIP1	AT5G49450	89	10.57	9.86	60.38	-1.051	Nucleus Cytoplasm	No
Dlo003481	Dlo_001705.1	DlbZIP64	AtbZIP64	AT3G17609	182	20.77	9.15	47.83	-1.257	Nucleus	No
Dlo004026	Dlo_011363.1	DlbZIP63	AtbZIP63	AT5G28770	432	46.63	6.33	62.84	-0.821	Nucleus	No
Dlo007018	Dlo_002105.1	DlbZIP52	AtbZIP52	AT1G06850	335	36.81	5.86	53.93	-0.601	Nucleus	No
Dlo009027	Dlo_020603.1	DlbZIP61.1	AtbZIP61	AT3G58120	344	38.24	6.64	57.76	-0.834	Nucleus	No
Dlo010657	Dlo_011387.1	DlbZIP18	AtbZIP18	AT2G40620	337	37.48	6.02	56.06	-0.849	Nucleus	No
Dlo011594	Dlo_030827.1	DlbZIP66.1	AtbZIP66	AT3G56850	336	37.38	8.56	44.77	-0.718	Nucleus	No
Dlo012009	Dlo_024982.1	DlbZIP53	AtbZIP53	AT3G62420	145	16.67	8.85	64.76	-0.751	Nucleus	No
Dlo012403	Dlo_023942.1	DlbZIP10	AtbZIP10	AT4G02640	426	46.16	5.43	56.33	-0.639	Nucleus	No
Dlo012653	Dlo_015178.2	DlbZIP55	AtbZIP55	AT2G46270	415	44.87	9.67	62.65	-0.665	Nucleus	No
Dlo013167	Dlo_028262.1	DlbZIP60	AtbZIP60	AT1G42990	302	33.71	4.93	60.61	-0.498	Nucleus	No
Dlo013489	Dlo_000764.1	DlbZIP44.1	AtbZIP44	AT1G75390	158	17.91	5.78	41.96	-0.718	Nucleus	No
Dlo013593	Dlo_025757.1	DlbZIP50	AtbZIP50	AT1G77920	361	40.9	6.39	58.43	-0.517	Nucleus	No
Dlo013594	Dlo_025756.1	DlbZIP66.2	AtbZIP66	AT3G56850	315	35.27	6.72	49.72	-0.601	Nucleus	No
Dlo013909	Dlo_010706.1	DlbZIP5	AtbZIP5	AT3G49760	147	17.49	6.85	68.63	-0.924	Nucleus	No
Dlo014751	Dlo_024741.2	DlbZIP51	AtbZIP51	AT1G43700	349	37.88	6.67	57.54	-0.715	Nucleus	No
Dlo014796	Dlo_010672.1	DlbZIP13.1	AtbZIP13	AT5G44080	289	31.85	7.78	48.08	-0.726	Nucleus	No
Dlo014828	Dlo_010672.1	DlbZIP13.2	AtbZIP13	AT5G44080	289	31.88	7.78	47.82	-0.717	Nucleus	No
Dlo015475	Dlo_021365.1	DlbZIP14	AtbZIP14	AT4G35900	302	33.89	6.7	53.67	-0.771	Nucleus	No
Dlo015604	Dlo_021497.1	DlbZIP2	AtbZIP2	AT2G18160	174	19.6	7.85	55.92	-0.471	Nucleus	No
Dlo015700	Dlo_000089.1	DlbZIP41	AtbZIP41	AT4G36730	354	37.22	5.36	63.36	-0.83	Nucleus	No
Dlo016043	Dlo_000438.1	DlbZIP6	AtbZIP6	AT2G22850	163	19.24	10.18	70.53	-0.956	Nucleus	No
Dlo017025	Dlo_005334.1	DlbZIP47	AtbZIP47	AT5G65210	364	41.34	6.05	50.24	-0.521	Nucleus	No
Dlo018222	Dlo_010957.1	DlbZIP46	AtbZIP46	AT1G68640	467	51.29	5.92	44.6	-0.41	Nucleus	No
Dlo018317	Dlo_013259.1	DlbZIP42.1	AtbZIP42	AT3G30530	243	27.38	8.49	61.37	-0.923	Nucleus	No
Dlo019123	Dlo_028625.1	DlbZIP23.1	AtbZIP23	AT2G16770	261	28.75	5.65	35.44	-0.622	Nucleus	No
Dlo020473	Dlo_017929.1	DlbZIP20	AtbZIP20	AT5G06950	468	51.81	6.78	57.71	-0.597	Nucleus	No
Dlo020496	Dlo_017904.1	DlbZIP17	AtbZIP17	AT2G40950	659	71.53	6.82	46.74	-0.437	Endoplasmic reticulum	No
Dlo023141	Dlo_024260.1	DlbZIP23.2	AtbZIP23	AT2G16770	270	29.53	6.09	34.52	-0.713	Nucleus	No
Dlo023234	Dlo_024355.1	DlbZIP29	AtbZIP29	AT4G38900	601	65.22	6.31	60.76	-0.876	Nucleus	No
Dlo023313	Dlo_000764.1	DlbZIP44.2	AtbZIP44	AT1G75390	165	18.4	5.77	58.78	-0.527	Nucleus	No
Dlo023526	Dlo_021352.1	DlbZIP37	AtbZIP37	AT4G34000	460	49.52	9.91	45.39	-0.518	Nucleus	No
Dlo023957	Dlo_026487.1	DlbZIP13.3	AtbZIP13	AT5G44080	259	29.02	5.78	61.19	-0.945	Nucleus	No
Dlo025422	Dlo_014859.3	DlbZIP66.3	AtbZIP66	AT3G56850	272	30.4	8.9	60.67	-0.769	Nucleus	No
Dlo025995	Dlo_032521.1	DlbZIP21	AtbZIP21	AT1G08320	503	55.45	6.75	51.46	-0.512	Nucleus	No
Dlo025997	Dlo_032523.1	DlbZIP67	AtbZIP67	AT3G44460	364	40.93	8.6	57.7	-0.654	Nucleus	No
Dlo027388	Dlo_022814.1	DlbZIP61.2	AtbZIP61	AT3G58120	297	33.66	6.08	55.9	-0.89	Nucleus	No
Dlo028114	Dlo_000963.1	DlbZIP65	AtbZIP65	AT5G06839	498	55.65	6.8	65.66	-0.606	Nucleus	No
Dlo028273	Dlo_024768.1	DlbZIP16	AtbZIP16	AT2G35530	414	43.83	6.27	59.65	-0.857	Nucleus	No
Dlo028392	Dlo_017026.1	DlbZIP45	AtbZIP45	AT3G12250	482	53.02	5.52	60.24	-0.536	Nucleus	No
Dlo029630	Dlo_009721.1	DlbZIP62	AtbZIP62	AT1G19490	518	57.12	6.9	51.41	-0.678	Nucleus	No
Dlo029652	Dlo_009698.1	DlbZIP39.1	AtbZIP39	AT2G36270	425	46.94	9.2	54.27	-0.754	Nucleus	No
Dlo030103	Dlo_026777.1	DlbZIP42.2	AtbZIP42	AT3G30530	193	22.48	6.53	60.61	-1.02	Nucleus	No
Dlo030898	Dlo_032523.1	DlbZIP39.2	AtbZIP39	AT2G36270	100	11.38	9.43	50.14	-1.037	Nucleus	No
Dlo031131	Dlo_025326.1	DlbZIP9.3	AtbZIP9	AT5G24800	346	38.08	6.35	56.04	-0.775	Nucleus	No
Dlo031187	Dlo_003564.1	DlbZIP70	AtbZIP70	AT5G60830	204	23.65	8.95	56.27	-0.675	Nucleus	No
Dlo034045	Dlo_012175.1	DlbZIP34	AtbZIP34	AT2G42380	319	36.04	8.05	52.7	-0.468	Nucleus	No
	Table S2. qRT- PCR primer sequences
	Gene ID(PacBio+Illumina+Hi-C)	Gene ID(Illumina)	Gene name	Sequences (5'to3')
	Dlo012403	Dlo_023942.1	DlbZIP10	CCGATTCGTTCTGGTCAT
				CAGGCGGAGAGACTATGTTG
	Dlo028273	Dlo_024768.1	DlbZIP16	AGACTGGTCAGGATTTCAGG
				GAATGGACGGATGAGCAT
	Dlo020473	Dlo_017929.1	DlbZIP20	CTCCTCCACTTCCAACTTCTA
				GCCTGGCTACTTGATTTCA
	Dlo023234	Dlo_024355.1	DlbZIP29	TCCTAATCAAATCCCACCC
				GGGCAACGAATCAAGTGA
	Dlo015700	Dlo_000089.1	DlbZIP41	TTGCTTCTCCAACTCCTCA
				GGCTCGGTCCTTTACTTCA
	Dlo013489	Dlo_000764.1	DlbZIP44.1	TTCCTCAGGTTCCACTCAGC
				TTCCTCAGACGACCCACTTC
	Dlo028392	Dlo_017026.1	DlbZIP45	GGAGGTGATGATGATGGTGA
				TGAGAACGGAATGTGCTTC
	Dlo013593	Dlo_025757.1	DlbZIP50	AGGCAGTGGAATAGATGGC
				TTGCTCCTCAACCCAGTGT
	Dlo014751	Dlo_024741.2	DlbZIP51	ACTCCGATACCTCCTACCGT
				GGGCTTGTTGTTGGAAGA
	Dlo012009	Dlo_024982.1	DlbZIP53	CGATACGCTAATGTGGACG
				TGCTTCTGCTTTCTCATCC
	Dlo012653	Dlo_015178.2	DlbZIP55	CGTTCAAGTCCAGTTTCTGCT
				GGGTTCCTAAGTTCCAAAGC
	Dlo013167	Dlo_028262.1	DlbZIP60	GAGTGAGCATTTGTTGGAGA
				AGGAGCAGATTCATCGGA
	Table S3. Vector construction primer sequences
	Primer Name	Gene name	Overall	Temperature	Sequences (5'to3')	Type
			length
	Dlo013167-1301-F	DlbZIP60	909	66.2℃	CGCGGATCCATGGAAAATGAGGAATTTCTGG	pCAMBIA1301-35S-GUS
	Dlo013167-1301-R			69.4℃	ACGCGTCGACCTAAGCTCTAAGAACATGAGAAATCAA	pCAMBIA1301-35S-GUS
	Dlo013167-1302-F			64.8℃	CATGCCATGGATGGAAAATGAGGAATTTCTGG	pCAMBIA1302-35S-GFP
	Dlo013167-1302-R			63.5℃	GGACTAGTAGCTCTAAGAACATGAGAAATCAATTT	pCAMBIA1302-35S-GFP
